# Supplementary material
Source: HighWire-hosted journal article supplement (https://rapm.bmj.com/content/rapm-2023-105024)
Supplement: inline-supplementary-material-2 [file inline-supplementary-material-2.pdf]

**SUPPLEMENTARY TABLE 2: PATIENT INTERVENTION COMPARISON OUTCOME (PICO) FOR INCLUSION AND EXCLUSION OF STUDIES EVALUATING PAIN MANAGEMENT AFTER CLEFT PALATE SURGERY**

|                     | Inclusion criteria                                                                                                       | Exclusion criteria                                                        |
|---------------------|--------------------------------------------------------------------------------------------------------------------------|---------------------------------------------------------------------------|
| <b>Population</b>   | Pediatric patients undergoing cleft palate surgery                                                                       | Non-operative procedure                                                   |
| <b>Intervention</b> | Any intervention addressing perioperative pain management                                                                | No pain management intervention assessed                                  |
| <b>Comparison</b>   | No limitations                                                                                                           |                                                                           |
| <b>Outcome</b>      | Linear pain intensity scale (VRS or NRS, etc.) or observational and behavioural assessment tools (FLAGG or CHEOPS, etc.) | Studies not including any form of a pain intensity measure                |
| <b>Study design</b> | Randomized controlled trials, systematic reviews, meta-analyses                                                          | Retrospective or observational studies                                    |
| <b>Publication</b>  | Full text articles, English language                                                                                     | Letters, study protocols, Studies without full text, non-English articles |
