# Supplementary material
Source: HighWire-hosted journal article supplement (https://rapm.bmj.com/content/rapm-2023-105024)
Supplement: inline-supplementary-material-3 [file inline-supplementary-material-3.pdf]

**SUPPLEMENTARY TABLE 3: SUMMARY OF KEY RESULTS FROM STUDIES EVALUATING SYSTEMIC ANALGESICS, SYSTEMIC ANALGESIC ADJUNCTS AND REGIONAL ANALGESIA USED TO SUPPORT THE RECOMMENDED INTERVENTIONS IN PATIENTS UNDERGOING CLEFT PALATE SURGERY**

| Study                                       | Study design                                                               | Pain scores                                                                                                                                                         | Total opioid consumption                                                                                                 | Basic analgesia and baseline analgesia                                                                    |
|---------------------------------------------|----------------------------------------------------------------------------|---------------------------------------------------------------------------------------------------------------------------------------------------------------------|--------------------------------------------------------------------------------------------------------------------------|-----------------------------------------------------------------------------------------------------------|
| <b>Suprazygomatic maxillary nerve block</b> |                                                                            |                                                                                                                                                                     |                                                                                                                          |                                                                                                           |
| Abu Elyazed, 2018 [12]                      | SMNB (n=30) vs Palatine block (n=30) vs control (n=30)                     | Favours SMNB vs control group; no significant difference between SMNB and palatine block group                                                                      | Favours SMNB vs palatine block and control group                                                                         | Basic analgesia: IV acetaminophen; no additional baseline analgesia                                       |
| Chiono et al. 2014 [13]                     | SMNB with ropivacaine (n=28) vs SMNB with saline (n=29)                    | No significant difference between groups                                                                                                                            | Favours SMNB with ropivacaine vs SMNB with saline group                                                                  | Basic analgesia: IV acetaminophen; baseline analgesia: IV methyl-prednisolone                             |
| <b>Palatal nerve block</b>                  |                                                                            |                                                                                                                                                                     |                                                                                                                          |                                                                                                           |
| Abu Elyazed, 2018 [12]                      | SMNB (n=30) vs palatine block (n=30) vs control (n=30)                     | Favours palatine block vs control group; no significant difference between palatine and SMNB block group                                                            | Favours SMNB vs palatine block group and control group                                                                   | Basic analgesia: IV acetaminophen; no additional baseline analgesia                                       |
| Jonnavithula et al. 2010 [14]               | Palatine block with bupivacaine (n=14) vs saline (n=15) vs no block (n=15) | Favours palatine block with bupivacaine group and saline group vs no block group; no significant difference between palatine block with bupivacaine vs saline group | Ibuprofen and acetaminophen as rescue (favours palatine block with bupivacaine group and saline group vs no block group) | Basic analgesia: only one dose of rectal acetaminophen after intubation; no additional baseline analgesia |

|                                                                                    |                                                                             |                                                                 |                                                                                         |                                                                                                       |
|------------------------------------------------------------------------------------|-----------------------------------------------------------------------------|-----------------------------------------------------------------|-----------------------------------------------------------------------------------------|-------------------------------------------------------------------------------------------------------|
| Kamath et al. 2009 [15]                                                            | Greater palatine nerve block (n=25) vs IV pethidine (n=25)                  | No significant difference between groups                        | Favours palatine nerve block vs IV pethidine group                                      | No basic or baseline analgesia                                                                        |
| <b>Dexmedetomidine as adjuvant for suprazygomatic maxillary nerve block (SMNB)</b> |                                                                             |                                                                 |                                                                                         |                                                                                                       |
| Mansour et al. 2021 [21]                                                           | Bupivacaine + dexmedetomidine (n=40) vs bupivacaine (n=40)                  | Favours bupivacaine + dexmedetomidine vs bupivacaine group      | Favours bupivacaine + dexmedetomidine vs bupivacaine group                              | Basic analgesia: IV acetaminophen; baseline analgesia: one dose of IV dexamethasone at end of surgery |
| Mostafa et al. 2020 [22]                                                           | Bupivacaine + dexmedetomidine (n=40) vs bupivacaine (n=40)                  | Favours bupivacaine + dexmedetomidine vs bupivacaine group      | IV acetaminophen as rescue (favours bupivacaine + dexmedetomidine vs bupivacaine group) | No basic or baseline analgesia                                                                        |
| Ramasamy et al. 2022 [23]                                                          | Bupivacaine + dexmedetomidine (n=23) vs bupivacaine (n=23)                  | Favours bupivacaine + dexmedetomidine vs bupivacaine group      | Favours bupivacaine + dexmedetomidine vs bupivacaine group                              | No basic or baseline analgesia                                                                        |
| <b>Dexmedetomidine intravenous</b>                                                 |                                                                             |                                                                 |                                                                                         |                                                                                                       |
| Boku et al. 2016 [30]                                                              | IV infusion with dexmedetomidine (n=35) vs saline (n=35)                    | Favours dexmedetomidine vs saline group                         | N/A                                                                                     | Basic analgesia: rectal acetaminophen; baseline analgesia: local anaesthesia infiltration             |
| Huang et al. 2022 [31]                                                             | IV infusion with dexmedetomidine (n=29) vs propofol (n=29) vs saline (n=28) | Favours dexmedetomidine vs propofol group and saline group      | N/A                                                                                     | No basic analgesia; baseline analgesia: IV infusion with sufentanil                                   |
| Luo et al. 2017 [32]                                                               | IV dexmedetomidine and sufentanil (n=47) vs saline + fentanyl (n=50)        | Favours dexmedetomidine + sufentanil vs saline + fentanyl group | Favours dexmedetomidine and sufentanil vs saline + fentanyl group                       | No basic or baseline analgesia                                                                        |
| Surana et al. 2017 [33]                                                            | IV infusion with dexmedetomidine (n=30) vs                                  | Favours dexmedetomidine vs midazolam group                      | Favours dexmedetomidine vs midazolam group                                              | Basic analgesia: rectal acetaminophen or                                                              |

---

|  |                  |  |  |                                                                                              |
|--|------------------|--|--|----------------------------------------------------------------------------------------------|
|  | midazolam (n=30) |  |  | ibuprofen<br>(depending on age);<br>baseline analgesia:<br>local anaesthesia<br>infiltration |
|--|------------------|--|--|----------------------------------------------------------------------------------------------|

---

Abbreviations: IV (intravenous); N/A (not applicable); NRS (numeric rating score); PO (per os); post op (postoperatively); SMNB (suprazygomatic maxillary nerve block); VAS (visual analogue scale)
