# Supplementary material
Source: HighWire-hosted journal article supplement (https://rapm.bmj.com/content/rapm-2023-105024)
Supplement: inline-supplementary-material-5 [file inline-supplementary-material-5.pdf]

## SUPPLEMENTARY TABLE 5: RISK OF BIAS ANALYSIS

|                          | Randomisation process | Deviations from the intended interventions | Missing outcome data | Measurement of the outcome | Selection of the reported result | Overall |
|--------------------------|-----------------------|--------------------------------------------|----------------------|----------------------------|----------------------------------|---------|
| Abu Elyazed et al. 2018  | +                     | +                                          | +                    | !                          | +                                | !       |
| Barbero et al. 2021      | +                     | +                                          | +                    | +                          | +                                | +       |
| Boku et al. 2016         | +                     | +                                          | +                    | +                          | !                                | !       |
| Chiono et al. 214        | +                     | +                                          | +                    | +                          | +                                | +       |
| Coban et al. 2008        | +                     | +                                          | +                    | !                          | !                                | !       |
| Huang et al. 2022        | +                     | +                                          | +                    | +                          | !                                | !       |
| Jha et al. 2013          | +                     | +                                          | +                    | +                          | !                                | !       |
| Jindal et al. 2022       | +                     | +                                          | +                    | +                          | +                                | +       |
| Jonnavithula et al. 2010 | +                     | +                                          | +                    | +                          | +                                | +       |
| Kamath et al. 2020       | +                     | +                                          | +                    | +                          | +                                | +       |
| Kheirabadi et al. 2020   | +                     | +                                          | +                    | +                          | +                                | +       |
| Luo et al. 2017          | !                     | +                                          | +                    | +                          | !                                | !       |
| Mansour et al. 2021      | +                     | +                                          | +                    | +                          | +                                | +       |
| Mostafa et al. 2020      | +                     | +                                          | +                    | +                          | +                                | +       |
| Mostafa et al. 2018      | +                     | +                                          | +                    | +                          | +                                | +       |
| Obayah et al. 2010       | +                     | +                                          | +                    | +                          | !                                | !       |
| Parameswaran et al. 2018 | !                     | +                                          | +                    | +                          | !                                | !       |
| Ramasamy et al. 2022     | +                     | +                                          | +                    | +                          | !                                | !       |
| Surana et al. 2017       | +                     | +                                          | +                    | +                          | !                                | !       |

 Low risk  
 Some concerns  
 High risk
